# Supplementary material for: Sensing Levofloxacin with an RNA Aptamer as a Bioreceptor
Source: MDPI journal article supplement (doi:10.3390/bios14010056), 2024-01-22
Supplement: s1 [file s1]

## Supplementary Information

Janice Kramat <sup>1,†</sup>, Leon Kraus <sup>1,†</sup>, Vincent J. Gunawan <sup>1</sup>, Elias Smyej <sup>1</sup>, Philipp Froehlich <sup>2</sup>, Tim E. Weber <sup>3</sup>, Dieter Spiehl <sup>3,4</sup>, Heinz Koepl <sup>2,4</sup>, Andreas Blaesser <sup>3,4</sup> and Beatrix Suess <sup>1,4,\*</sup>

<sup>1</sup> Synthetic RNA Biology, Department of Biology, Technical University of Darmstadt, 64287 Darmstadt, Germany

<sup>2</sup> Self-Organizing Systems, Department of Electrical Engineering and Information Technology, Technical University of Darmstadt, 64283 Darmstadt, Germany

<sup>3</sup> Institute for BioMedical Printing Technologies, Technical University of Darmstadt, 64289 Darmstadt, Germany

<sup>4</sup> Centre for Synthetic Biology, Technical University of Darmstadt, 64289 Darmstadt, Germany

\* Correspondence: bsuess@bio.tu-darmstadt.de

† These authors contributed equally to this work.

|                                                                                                                                     |      |
|-------------------------------------------------------------------------------------------------------------------------------------|------|
| <b>Supplementary Figure S1:</b> The RNA-Capture-SELEX.                                                                              | P.2  |
| <b>Supplementary Figure S2:</b> Bioinformatic workflow of the NGS analysis.                                                         | P.3  |
| <b>Supplementary Figure S3:</b> Boxplot of Expected Error Distribution by File                                                      | P.4  |
| <b>Supplementary Figure S4:</b> Printing and assembly of the LFA strip.                                                             | P.5  |
| <b>Supplementary Figure S5:</b> Secondary structure of aptamer LxC.                                                                 | P.6  |
| <b>Supplementary Figure S6:</b> ITC thermogram and titration curve of the aptamer variant M1.                                       | P.7  |
| <b>Supplementary Figure S7:</b> ITC thermogram and titration curve of the aptamer variant M2.                                       | P.8  |
| <b>Supplementary Figure S8:</b> ITC thermogram and titration curve of the aptamer variant M3.                                       | P.9  |
| <b>Supplementary Figure S9:</b> ITC thermogram and titration curve of the aptamer variant M4.                                       | P.10 |
| <b>Supplementary Figure S10:</b> ITC thermogram and titration curve of the aptamer variant M5.                                      | P.11 |
| <b>Supplementary Figure S11:</b> ITC thermogram and titration curve of the aptamer variant M6.                                      | P.12 |
| <b>Supplementary Figure S12:</b> ITC thermogram and titration curve of the aptamer variant M7.                                      | P.13 |
| <b>Supplementary Figure S13:</b> ITC thermogram and titration curve of the aptamer variant M8.                                      | P.14 |
| <b>Supplementary Figure S14:</b> ITC thermogram and titration curve of the aptamer variant M9.                                      | P.15 |
| <b>Supplementary Figure S15:</b> ITC thermogram and titration curve of the aptamer variant M10.                                     | P.16 |
| <b>Supplementary Figure S16:</b> ITC thermogram and titration curve of the aptamer variant M11.                                     | P.17 |
| <b>Supplementary Figure S17:</b> ITC thermogram and titration curve of the aptamer variant M12.                                     | P.18 |
| <b>Supplementary Figure S18:</b> ITC thermogram and titration curve of the aptamer variant M13.                                     | P.19 |
| <b>Supplementary Figure S19:</b> ITC thermogram and titration curve of the aptamer variant M14.                                     | P.20 |
| <b>Supplementary Table S1:</b> Results of 21 rounds and naive pool of merging paired-end reads using VSEARCH's mergepairs function. | P.21 |
| <b>Supplementary Table S2:</b> Post-Merging Sequence Filtering Results Over 21 Rounds and naive pool.                               | P.22 |
| <b>Supplementary Table S3:</b> Number of Unique Sequence Counts Through Preprocessing Stages Over 21 Rounds Plus Naive Pool.        | P.23 |

## Supplementary Figure S1

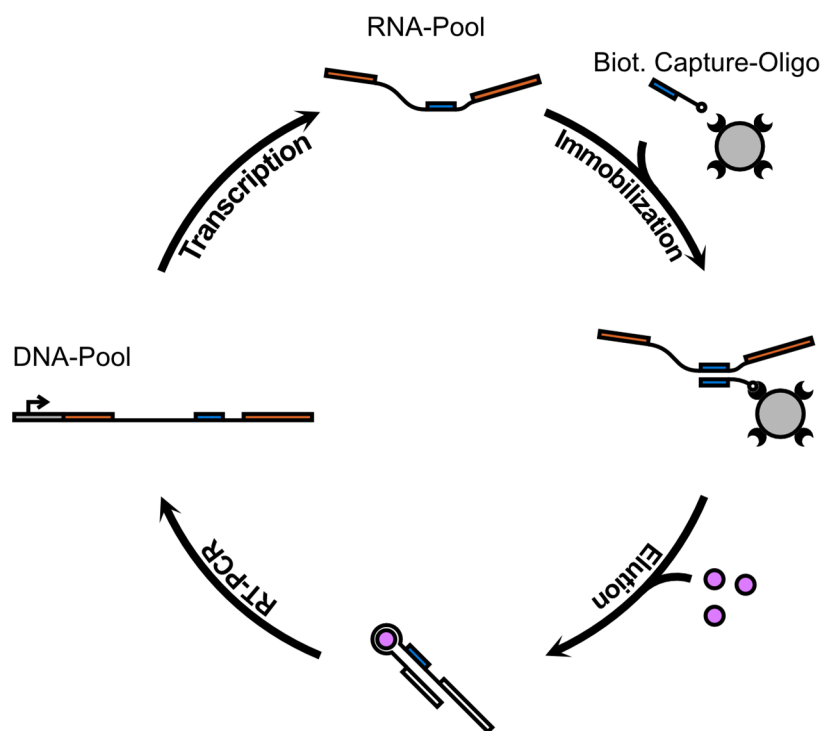

**Figure S1. The RNA-Capture-SELEX.** Based on Figure 1 in [34]. A randomized DNA-library is transcribed to RNA *in vitro*. The resulting RNA library is hybridized with a biotinylated DNA Capture-ON. The hybridized sequences are immobilized on streptavidin conjugated magnetic beads with the biotin groups of the Capture-ON. A solution containing the target molecule is added. Sequences that undergo a structural change upon ligand binding are eluted. The eluted fraction is recovered, reverse-transcribed and amplified using PCR. The now enriched DNA pool is transcribed again and used for the next cycle.

## Supplementary Figure S2

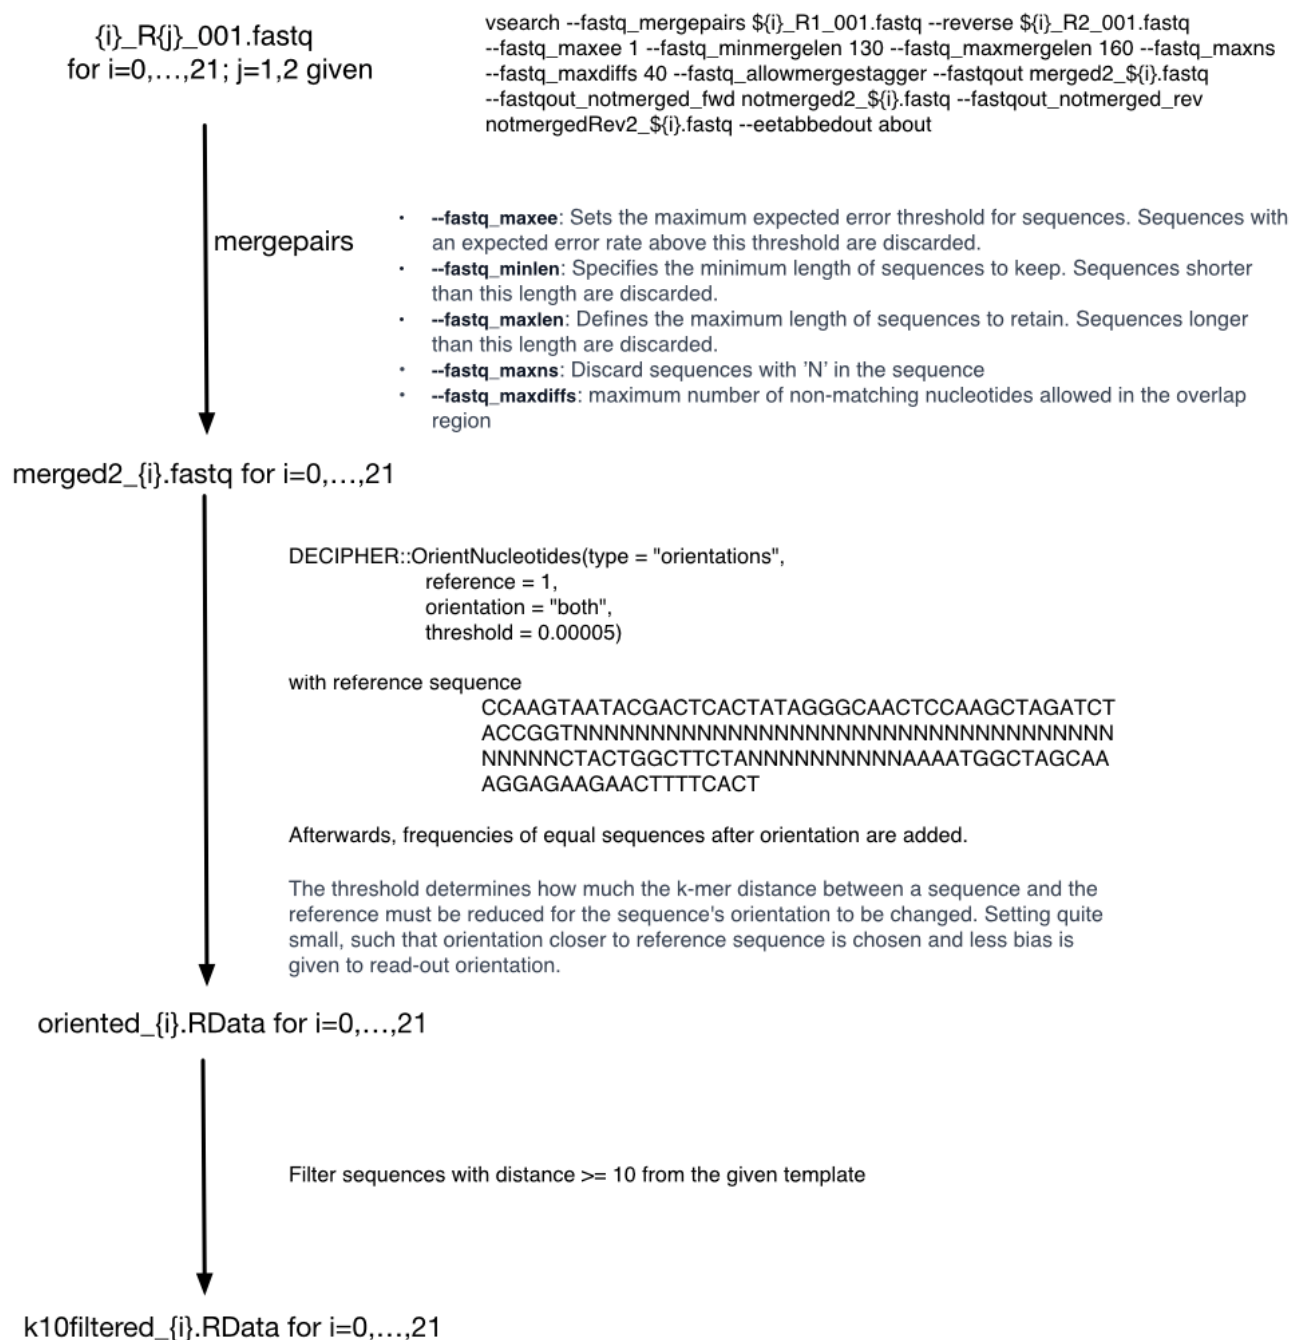

Figure S2. Bioinformatic workflow of the NGS analysis.

## Supplementary Figure S3

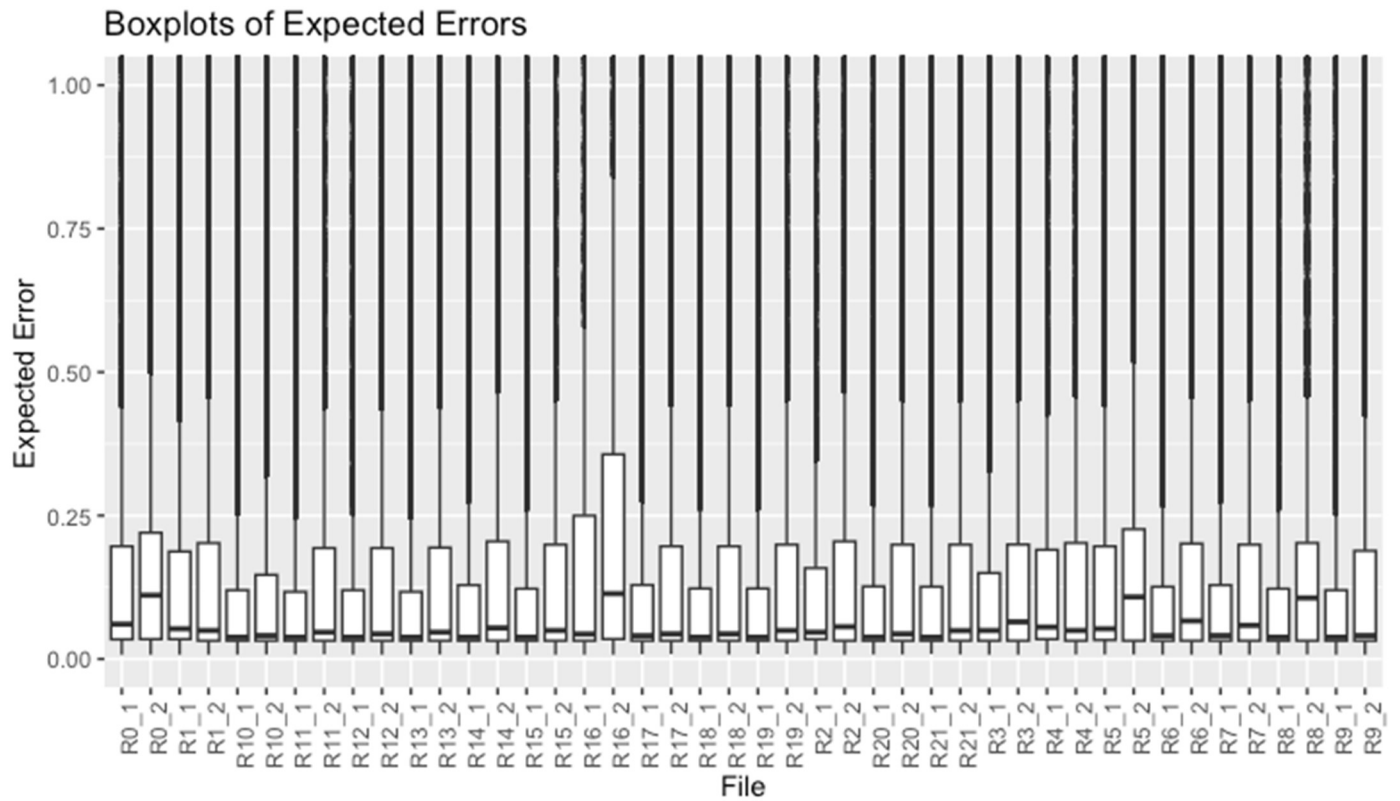

**Figure S3. Boxplot of Expected Error Distribution by File.** Displays the distribution of expected errors for each sequence derived from sequence quality scores across 22 pools and two orientations. Each boxplot shows the median (central line), interquartile range (box), and 1.5 IQR 'whiskers', with outliers as individual points. This plot provides a succinct overview of sequencing quality across different samples.

## Supplementary Figure S4

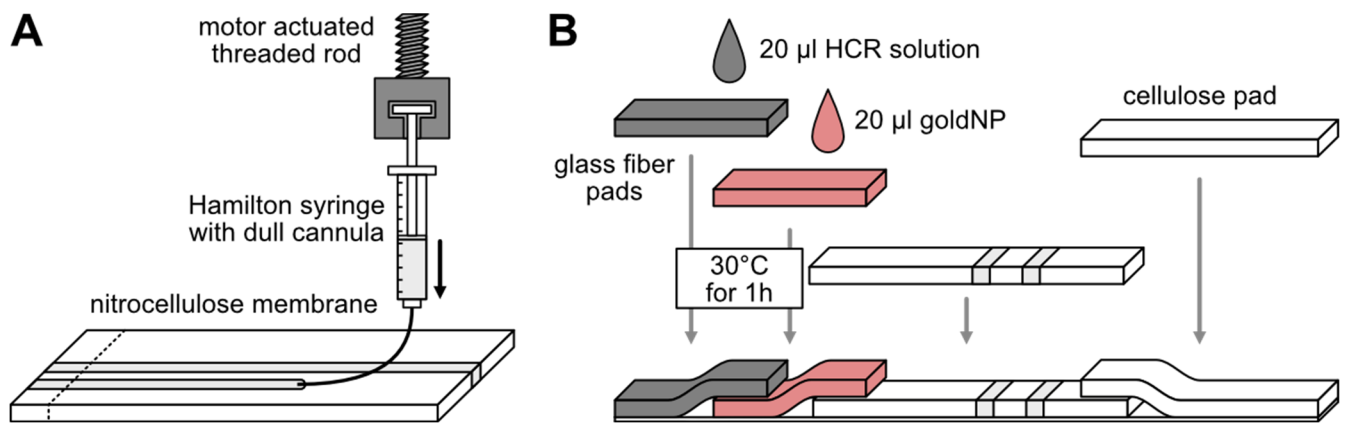

**Figure S4. Printing and assembly of the LFA strip.** (A) Test and control bands were applied to the nitrocellulose membrane using a modified Hyrel 30M 3D printer that held a 100  $\mu$ l Hamilton syringe that was actuated using a threaded rod and electric motor. Strips were then cut as shown by the dashed line. (B) Glass fiber pads were infused with either 20  $\mu$ l of HCR solution or gold nanoparticle suspension (gold NP) and dried for 1h at 30°C. Glass fiber pads, cut nitrocellulose strip and cellulose pad were then assembled on adhesive tape.

### Supplementary Figure S5

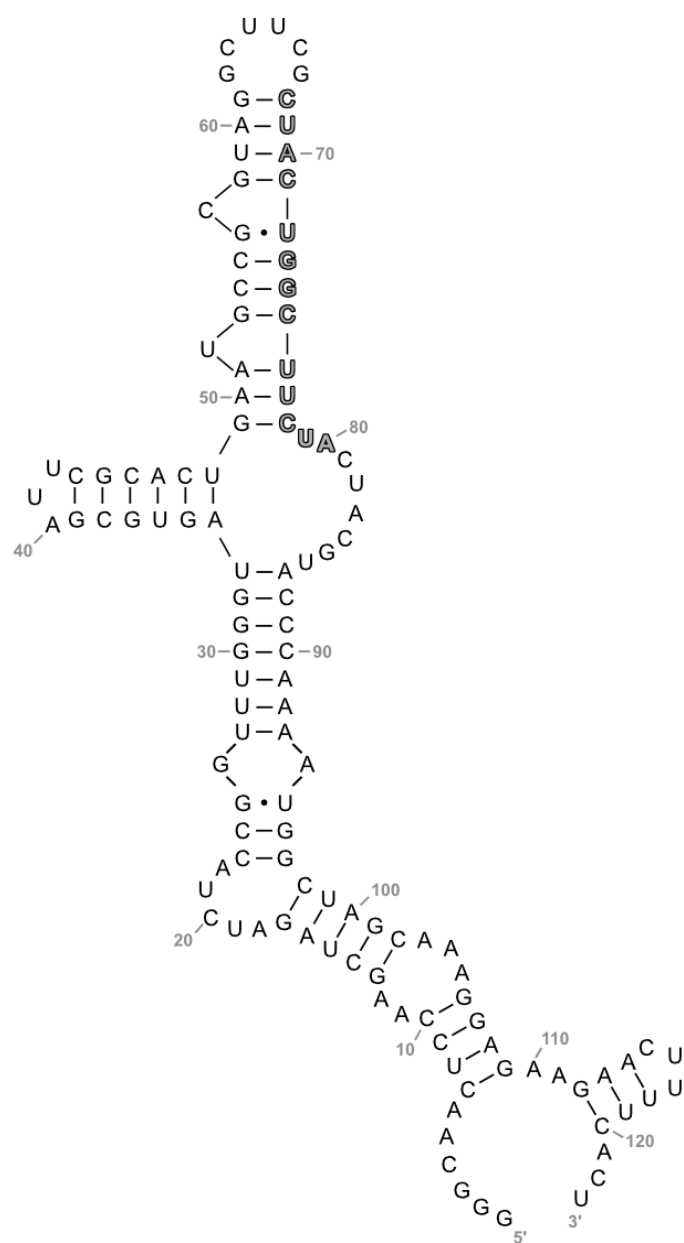

**Figure S5. Secondary structure of aptamer LxC.** As predicted using RNAfold [39] Capture sequence is marked in bold grey.

## Supplementary Figure S6

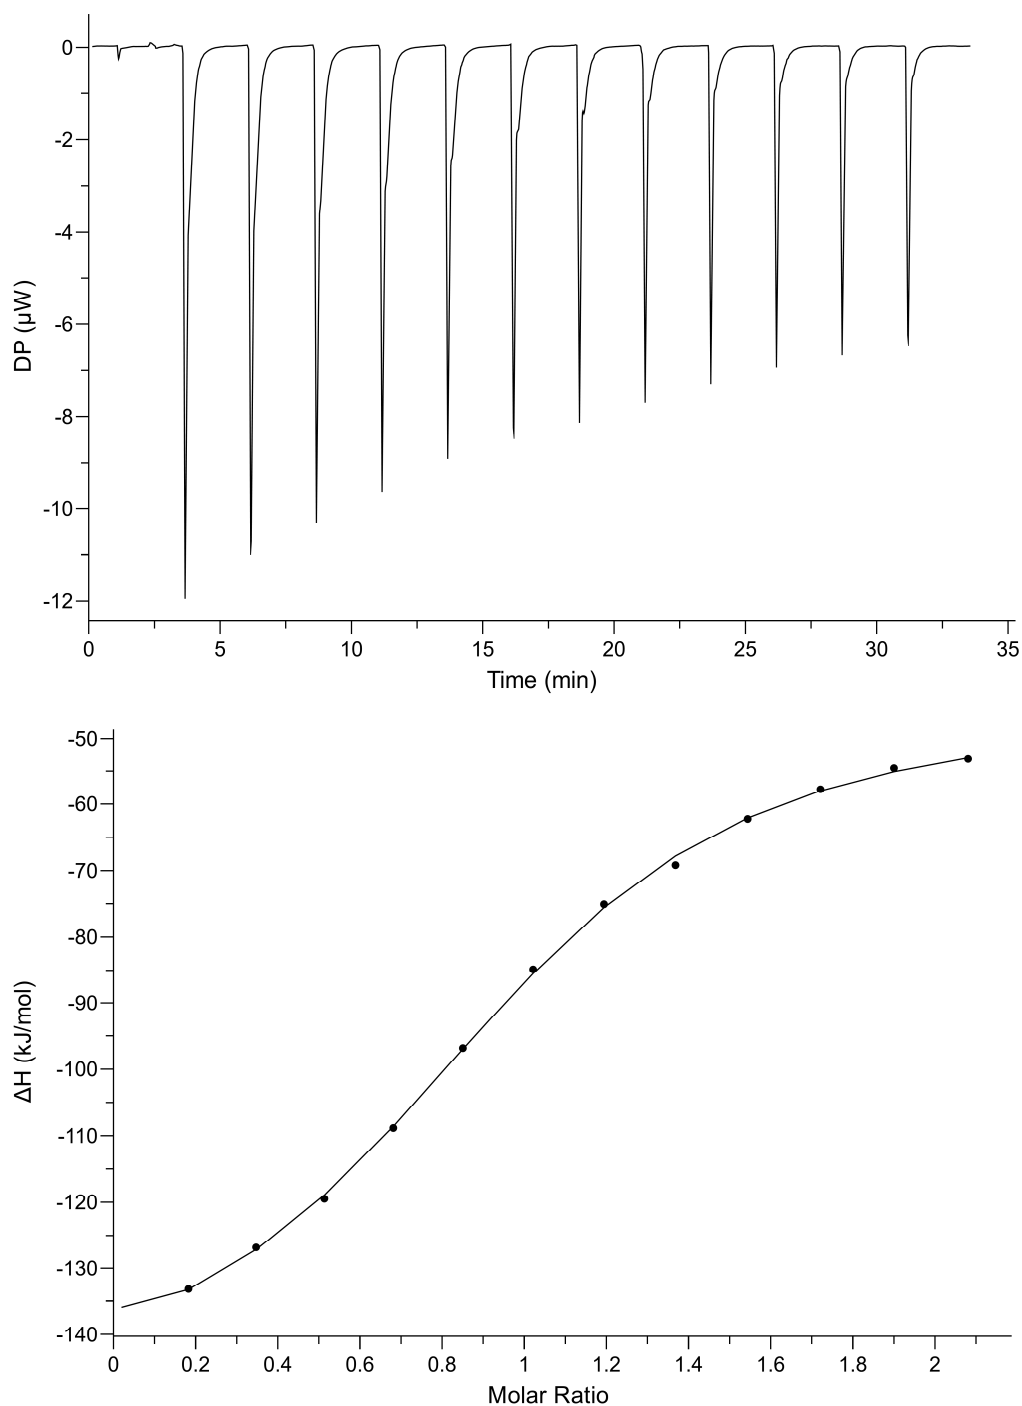

**Figure S6. ITC thermogram and titration curve of the aptamer variant M1.** Titrated with LFX. Each ITC experiment was repeated at least twice, representative thermogram and titration curve are shown.

## Supplementary Figure S7

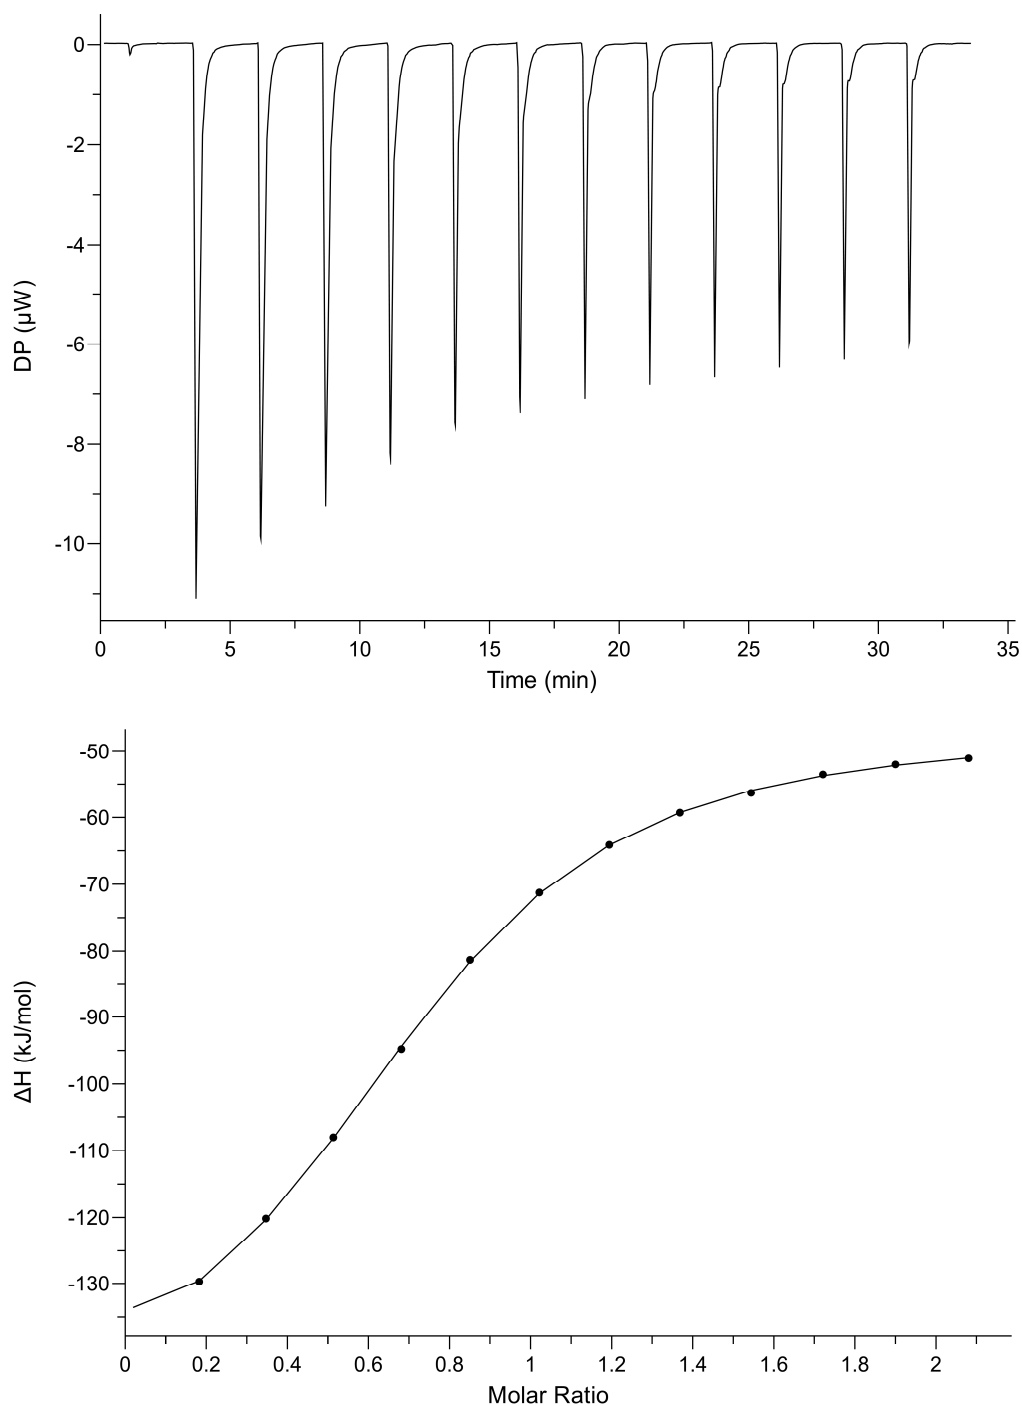

**Figure S7. ITC thermogram and titration curve of the aptamer variant M2.** Titrated with LFX. Each ITC experiment was repeated at least twice, representative thermogram and titration curve are shown.



## Supplementary Figure S8

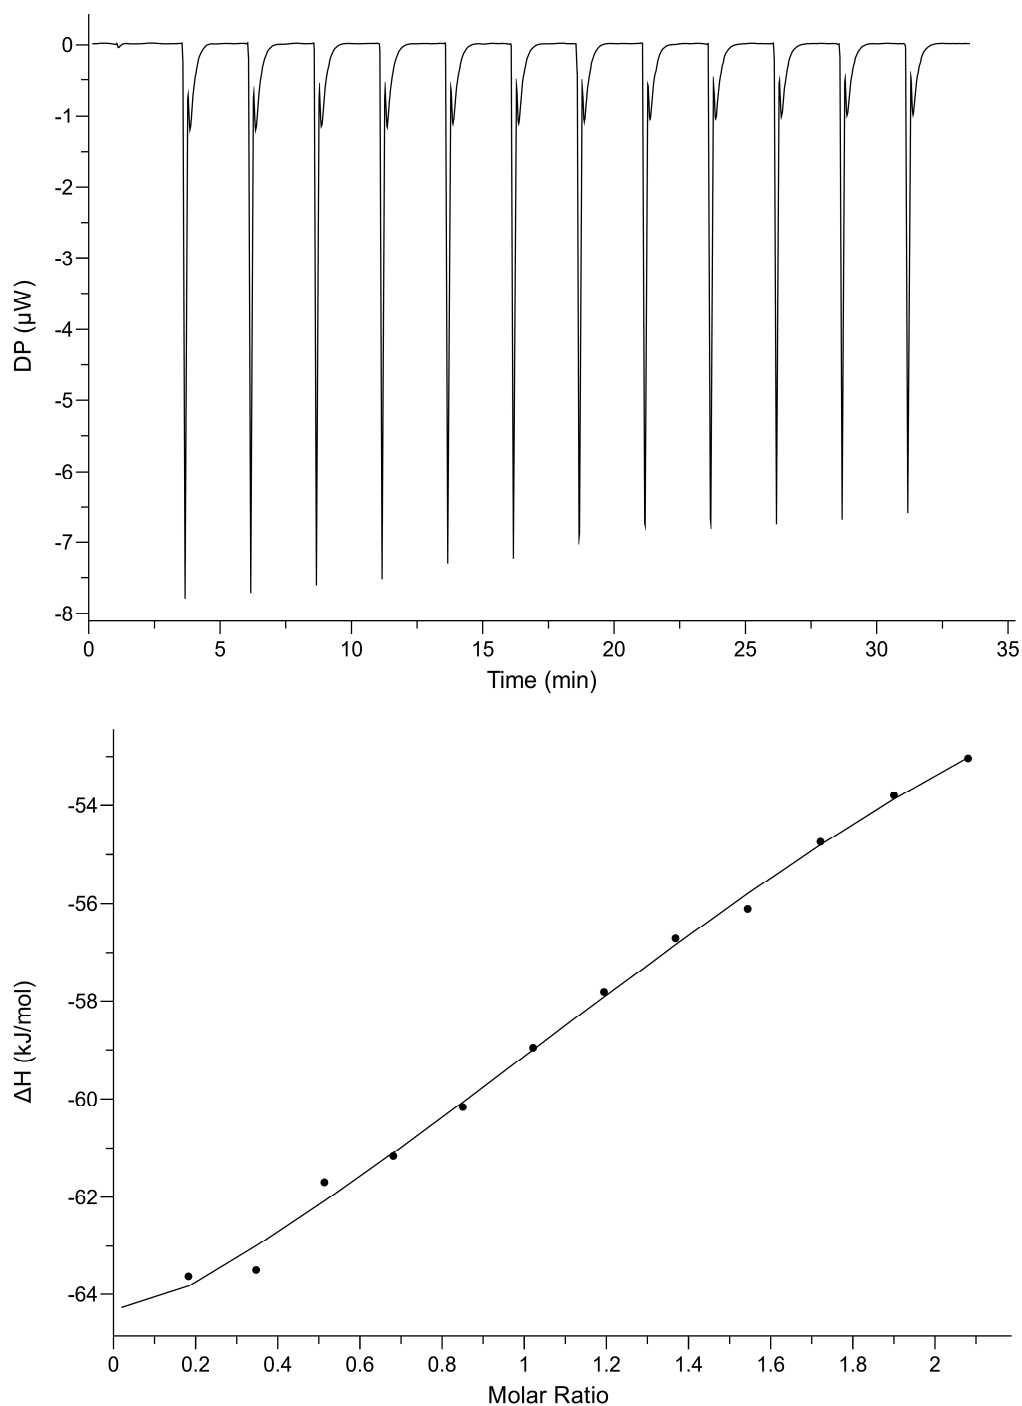

**Figure S8. ITC thermogram and titration curve of the aptamer variant M3.** Titrated with LFX. Each ITC experiment was repeated at least twice, representative thermogram and titration curve are shown.

## Supplementary Figure S9

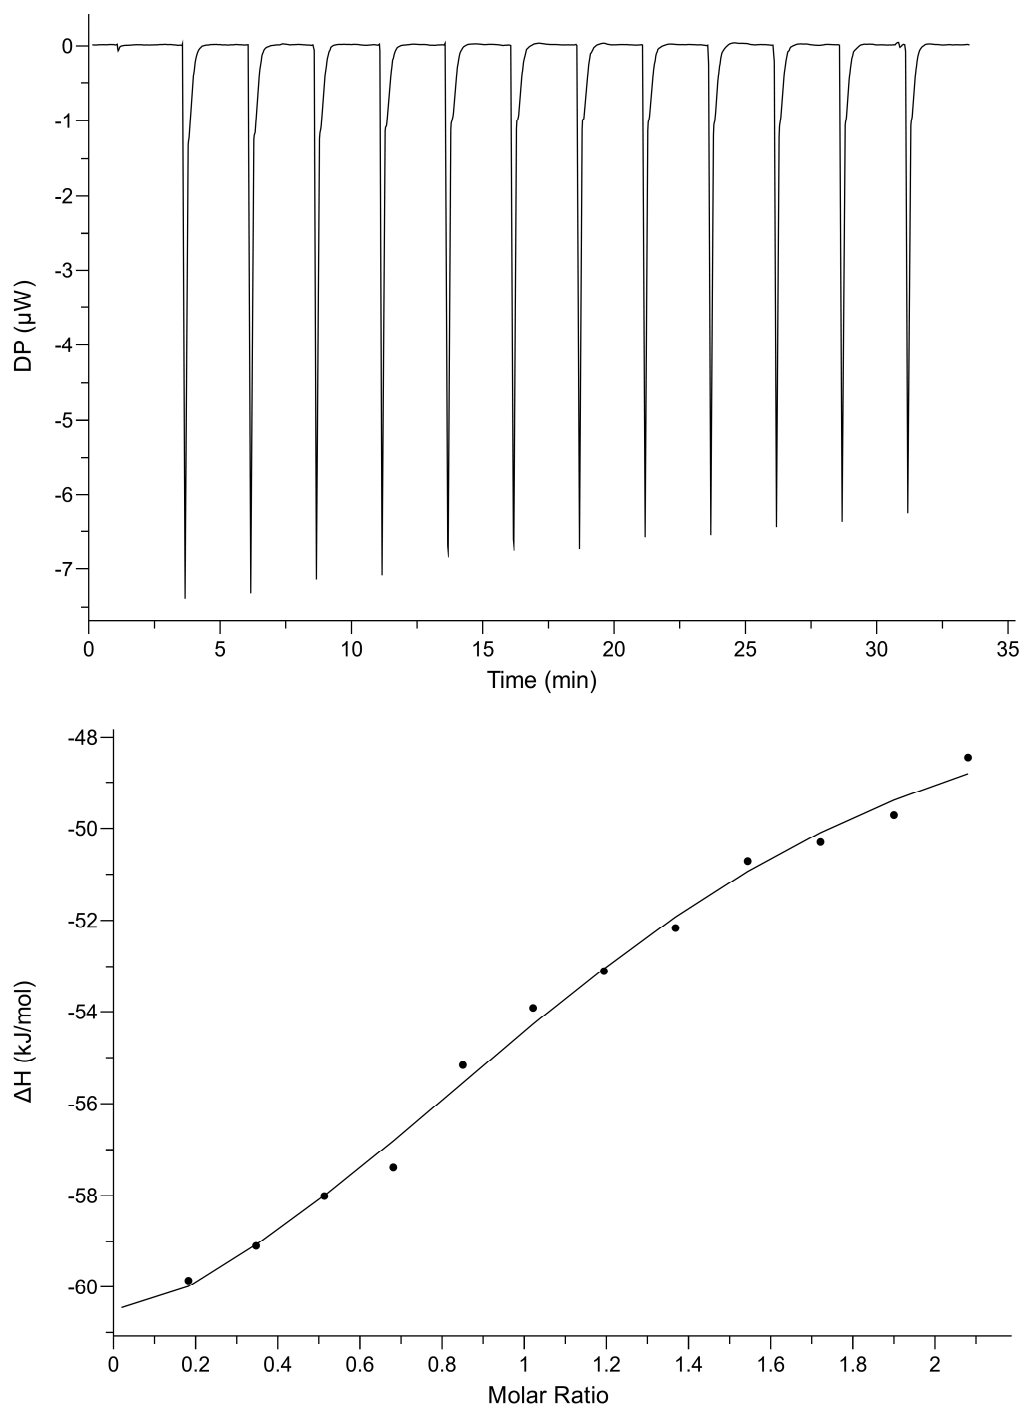

**Figure S9. ITC thermogram and titration curve of the aptamer variant M4.** Titrated with LFX. Each ITC experiment was repeated at least twice, representative thermogram and titration curve are shown.

## Supplementary Figure S10

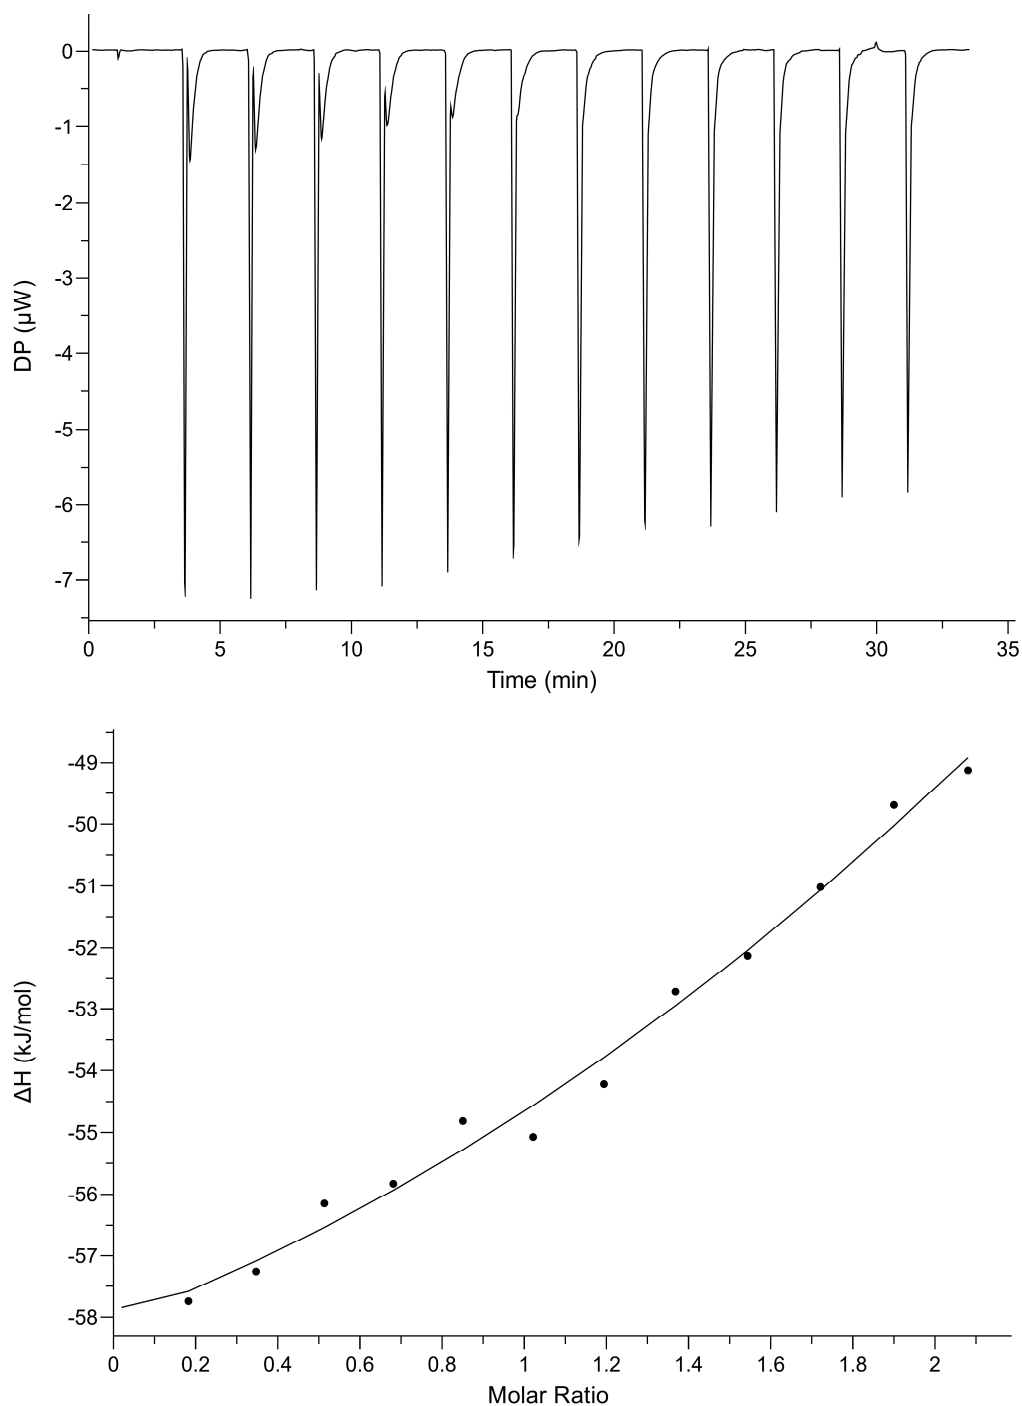

**Figure S10.** ITC thermogram and titration curve of the aptamer variant M5. Titrated with LFX. Each ITC experiment was repeated at least twice, representative thermogram and titration curve are shown.

## Supplementary Figure S11

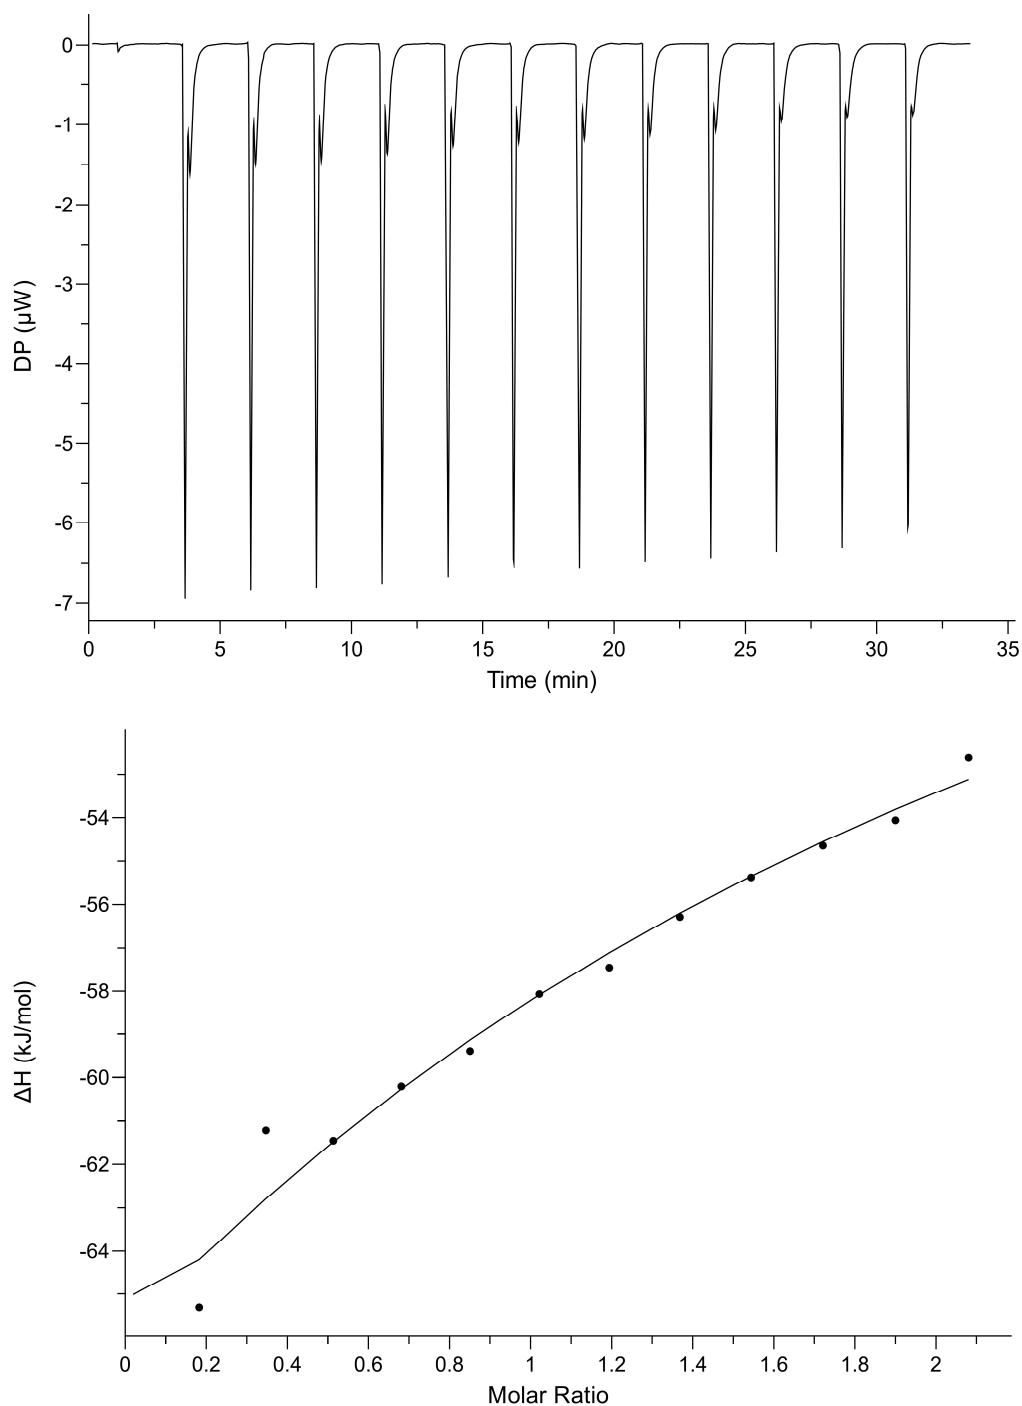

**Figure S11.** ITC thermogram and titration curve of the aptamer variant M6. Titrated with LFX. Each ITC experiment was repeated at least twice, representative thermogram and titration curve are shown.

## Supplementary Figure S12

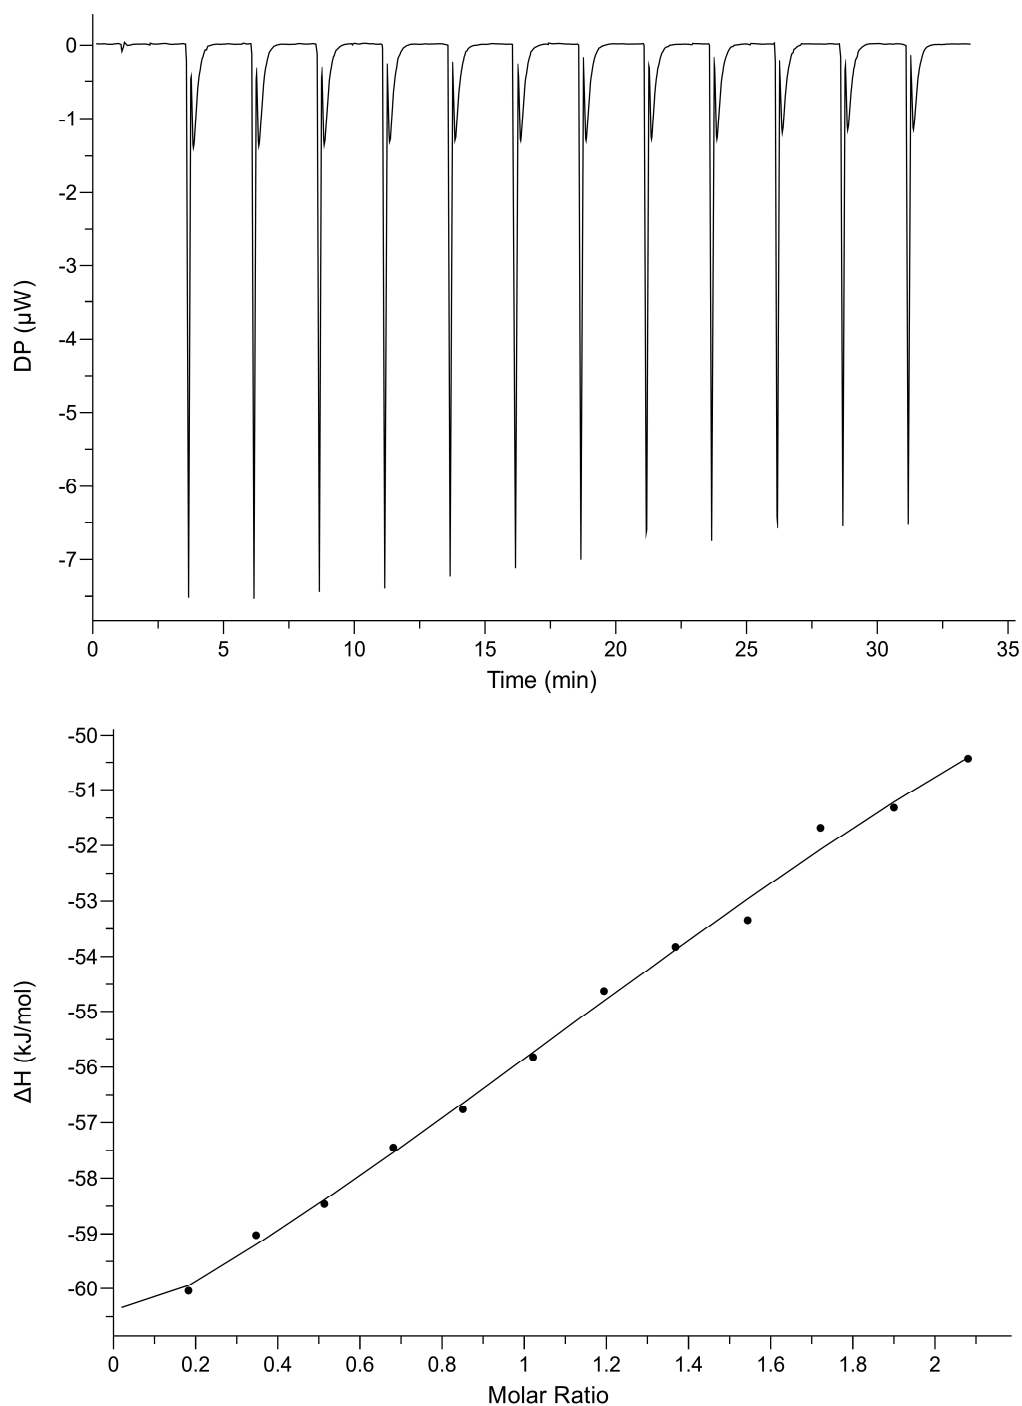

**Figure S12.** ITC thermogram and titration curve of the aptamer variant M7. Titrated with LFX. Each ITC experiment was repeated at least twice, representative thermogram and titration curve are shown.

## Supplementary Figure S13

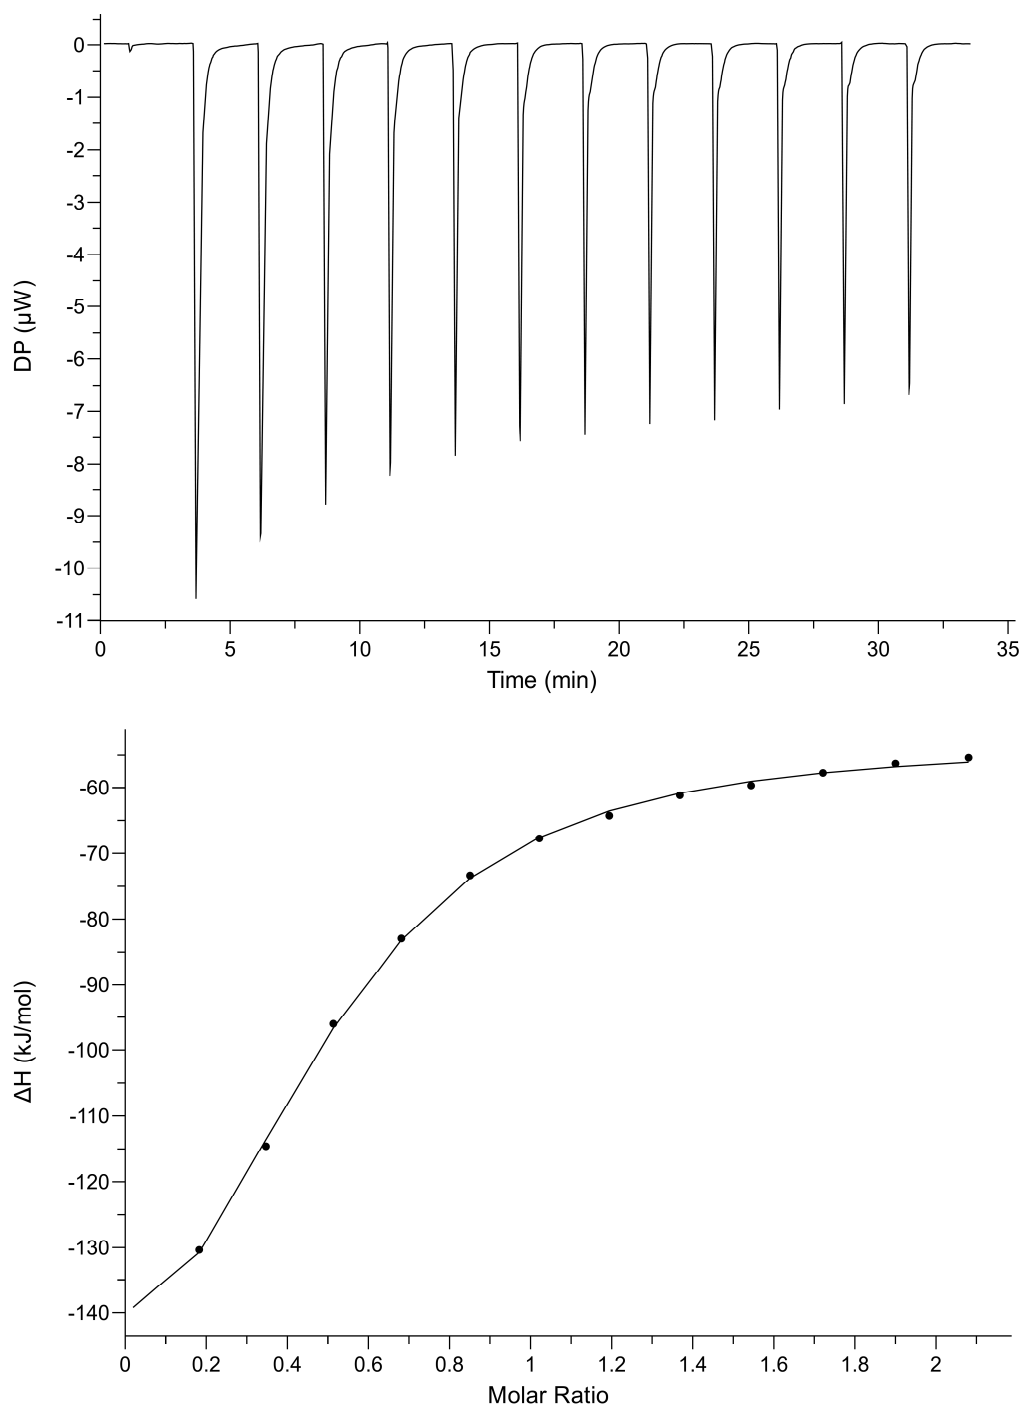

**Figure S13.** ITC thermogram and titration curve of the aptamer variant M8. Titrated with LFX. Each ITC experiment was repeated at least twice, representative thermogram and titration curve are shown.

## Supplementary Figure S14

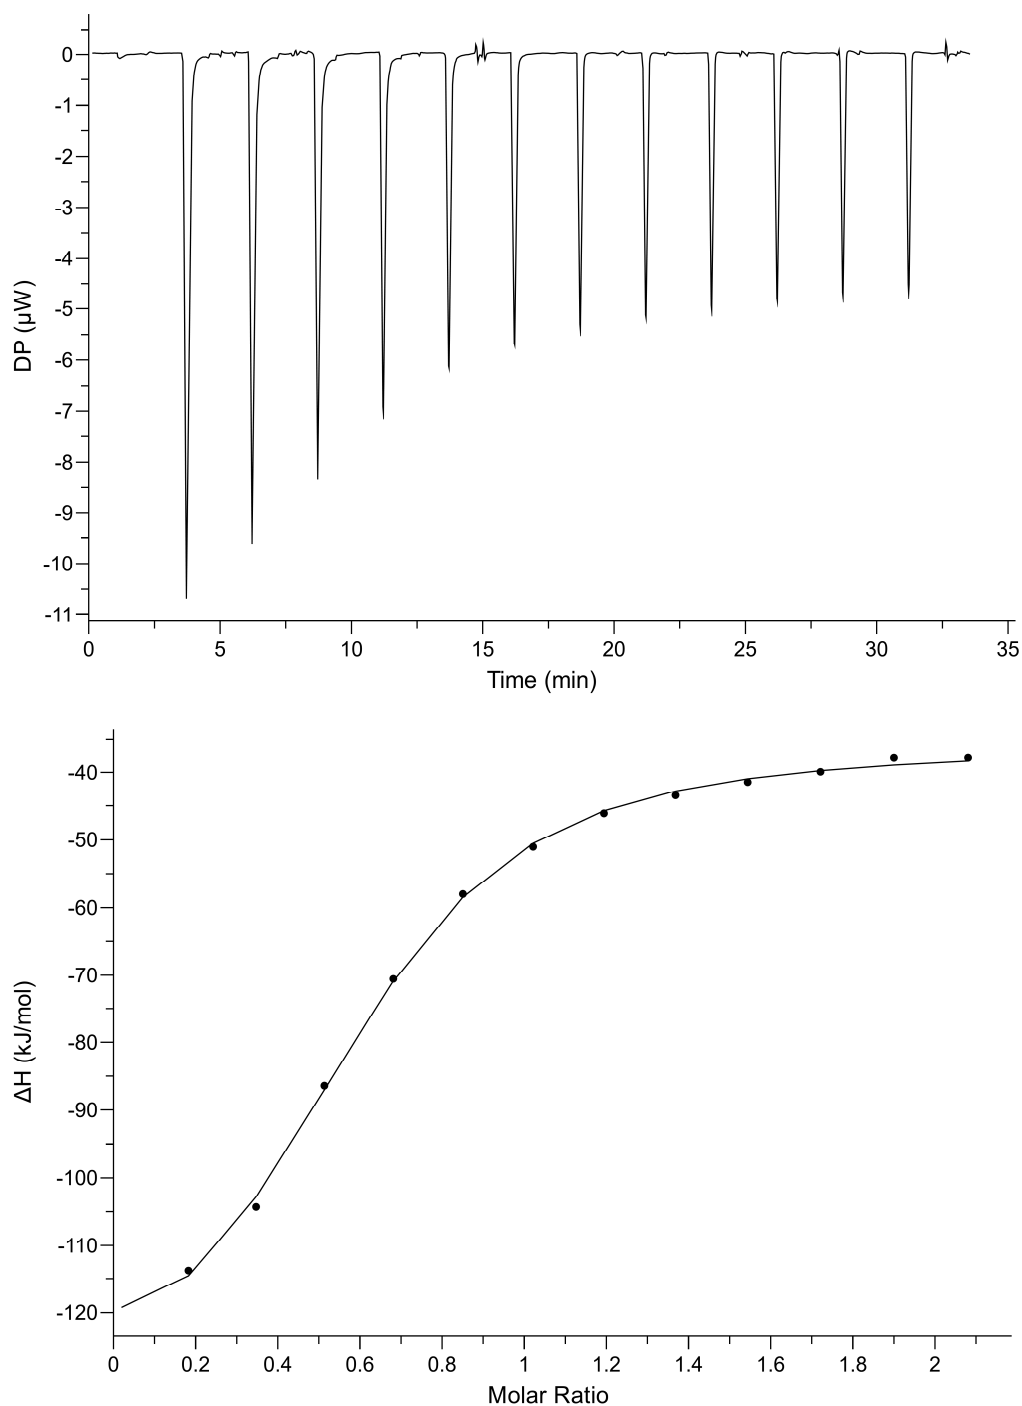

**Figure S14.** ITC thermogram and titration curve of the aptamer variant M9. Titrated with LFX. Each ITC experiment was repeated at least twice, representative thermogram and titration curve are shown.

## Supplementary Figure S15

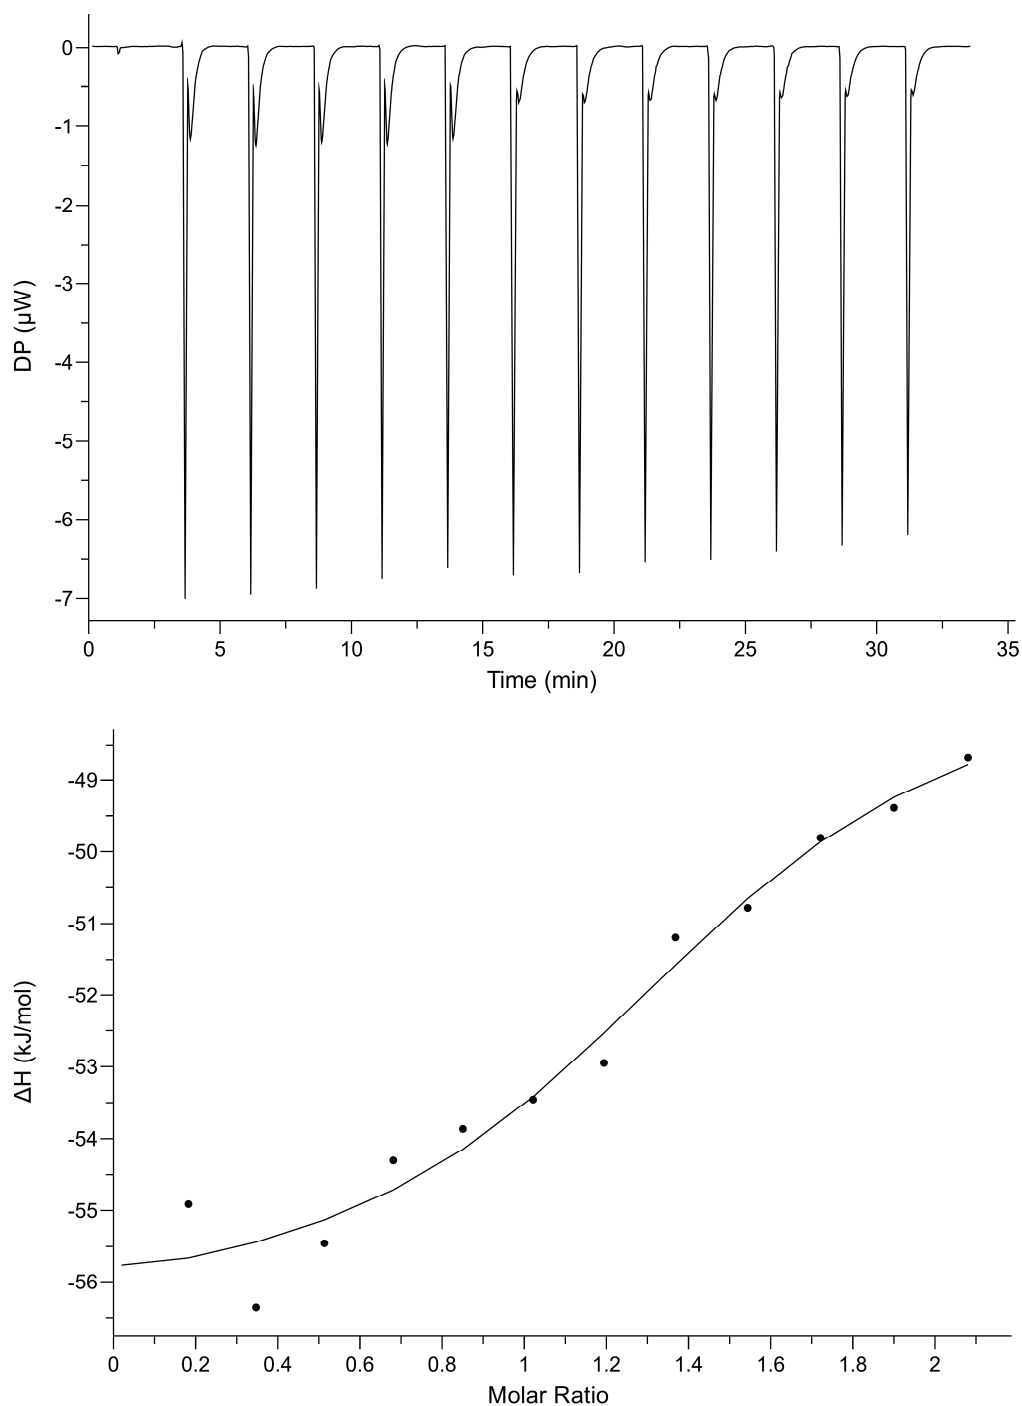

**Figure S15. ITC thermogram and titration curve of the aptamer variant M10.** Titrated with LFX. Each ITC experiment was repeated at least twice, representative thermogram and titration curve are shown.



## Supplementary Figure S16

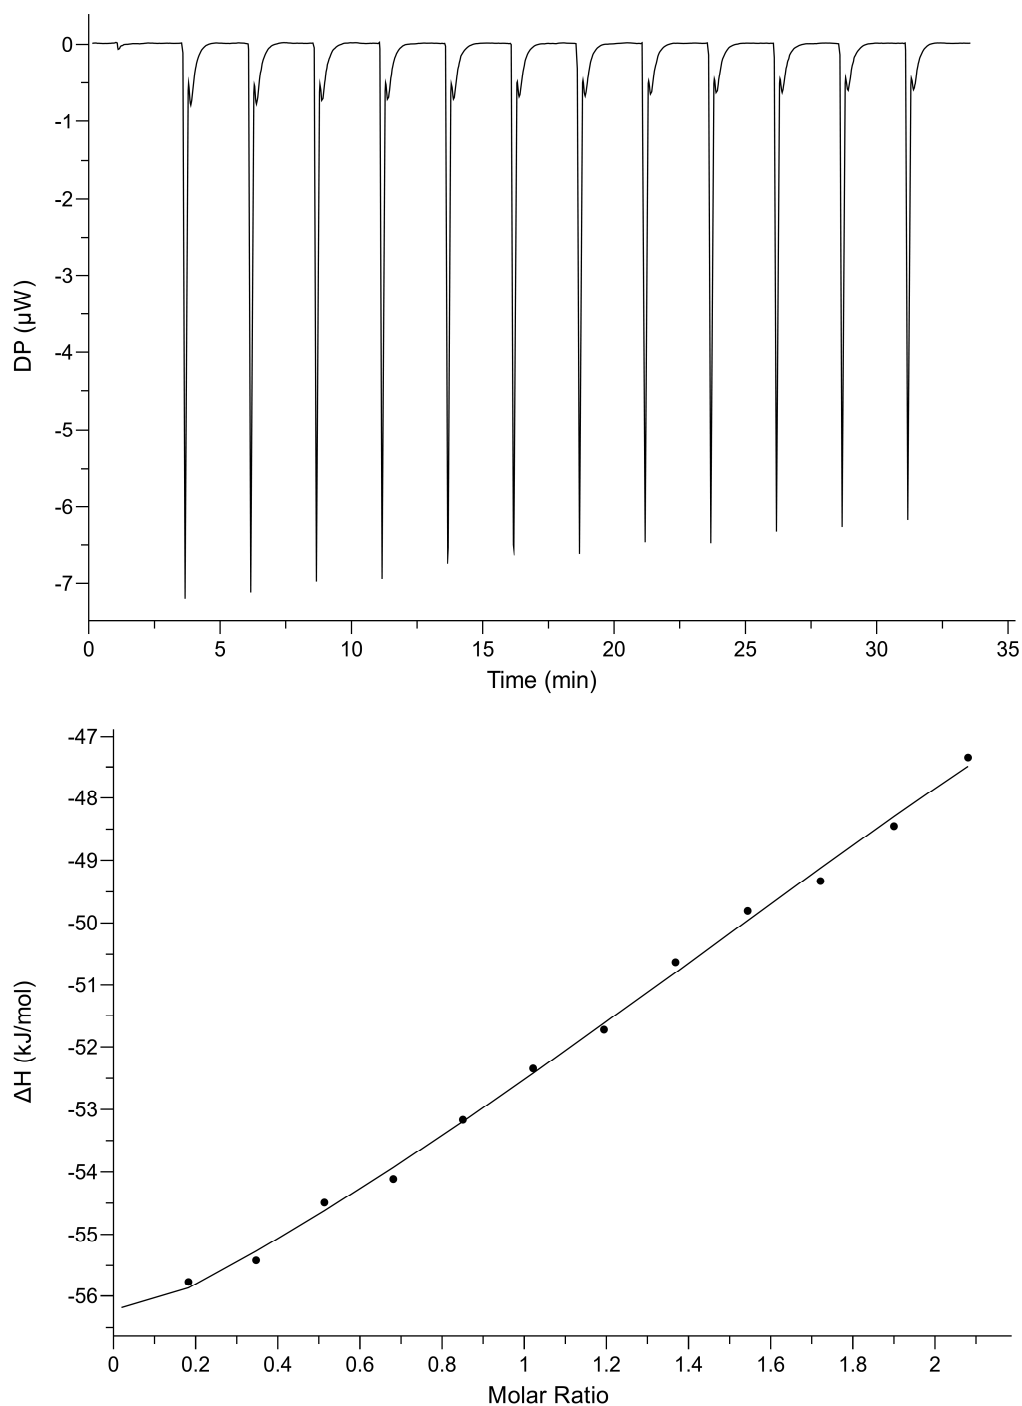

**Figure S16.** ITC thermogram and titration curve of the aptamer variant M11. Titrated with LFX. Each ITC experiment was repeated at least twice, representative thermogram and titration curve are shown.

## Supplementary Figure S17

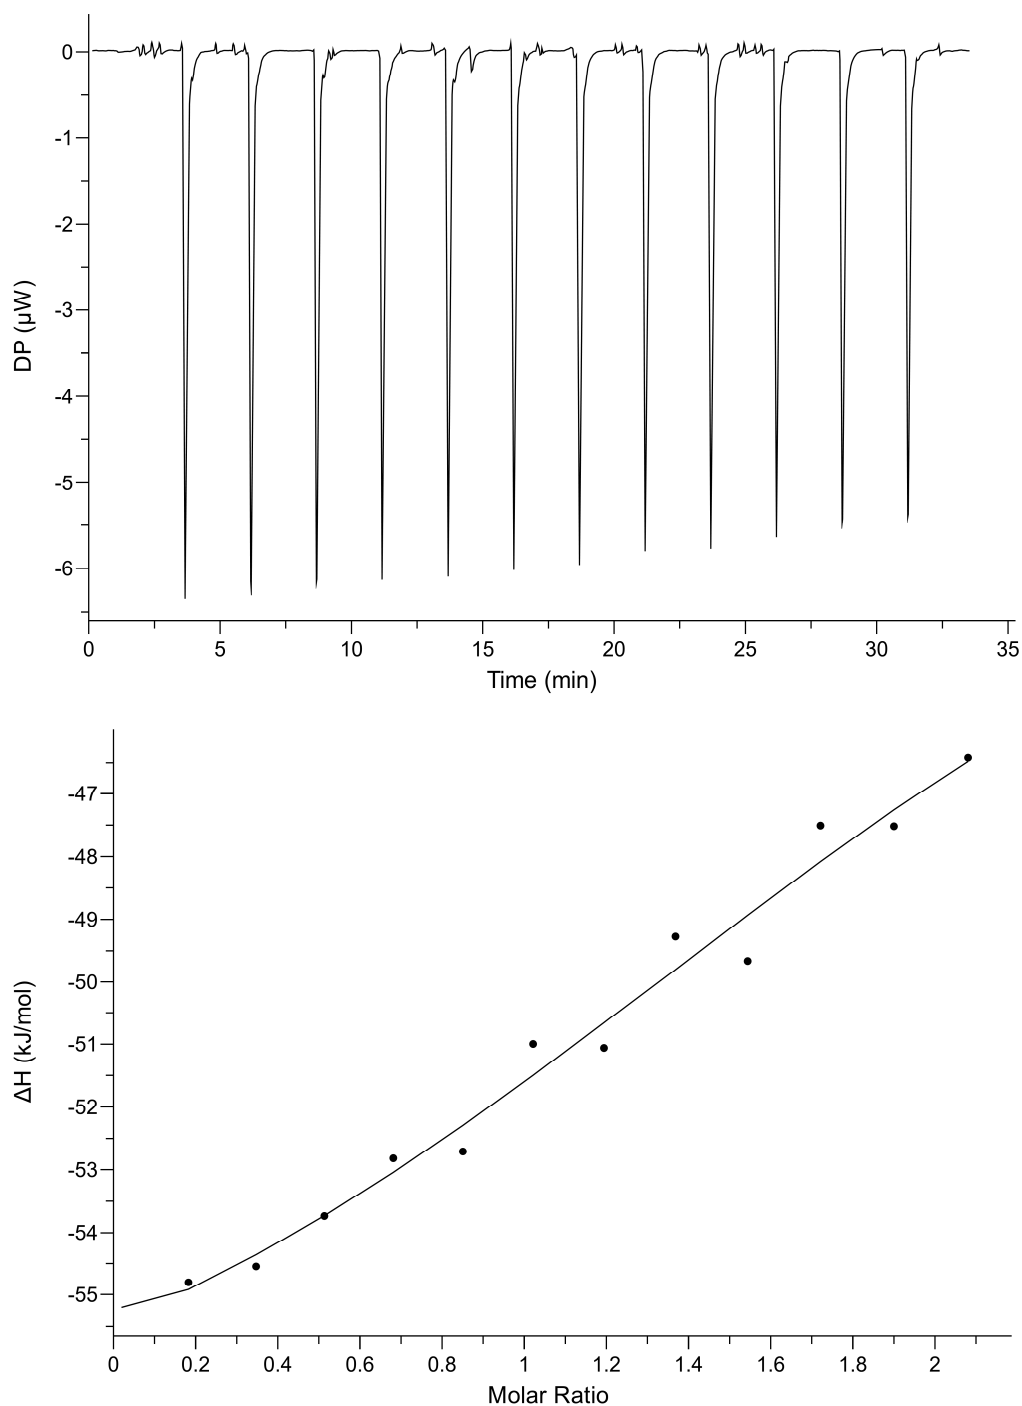

**Figure S17. ITC thermogram and titration curve of the aptamer variant M12.** Titrated with LFX. Each ITC experiment was repeated at least twice, representative thermogram and titration curve are shown.

## Supplementary Figure S18

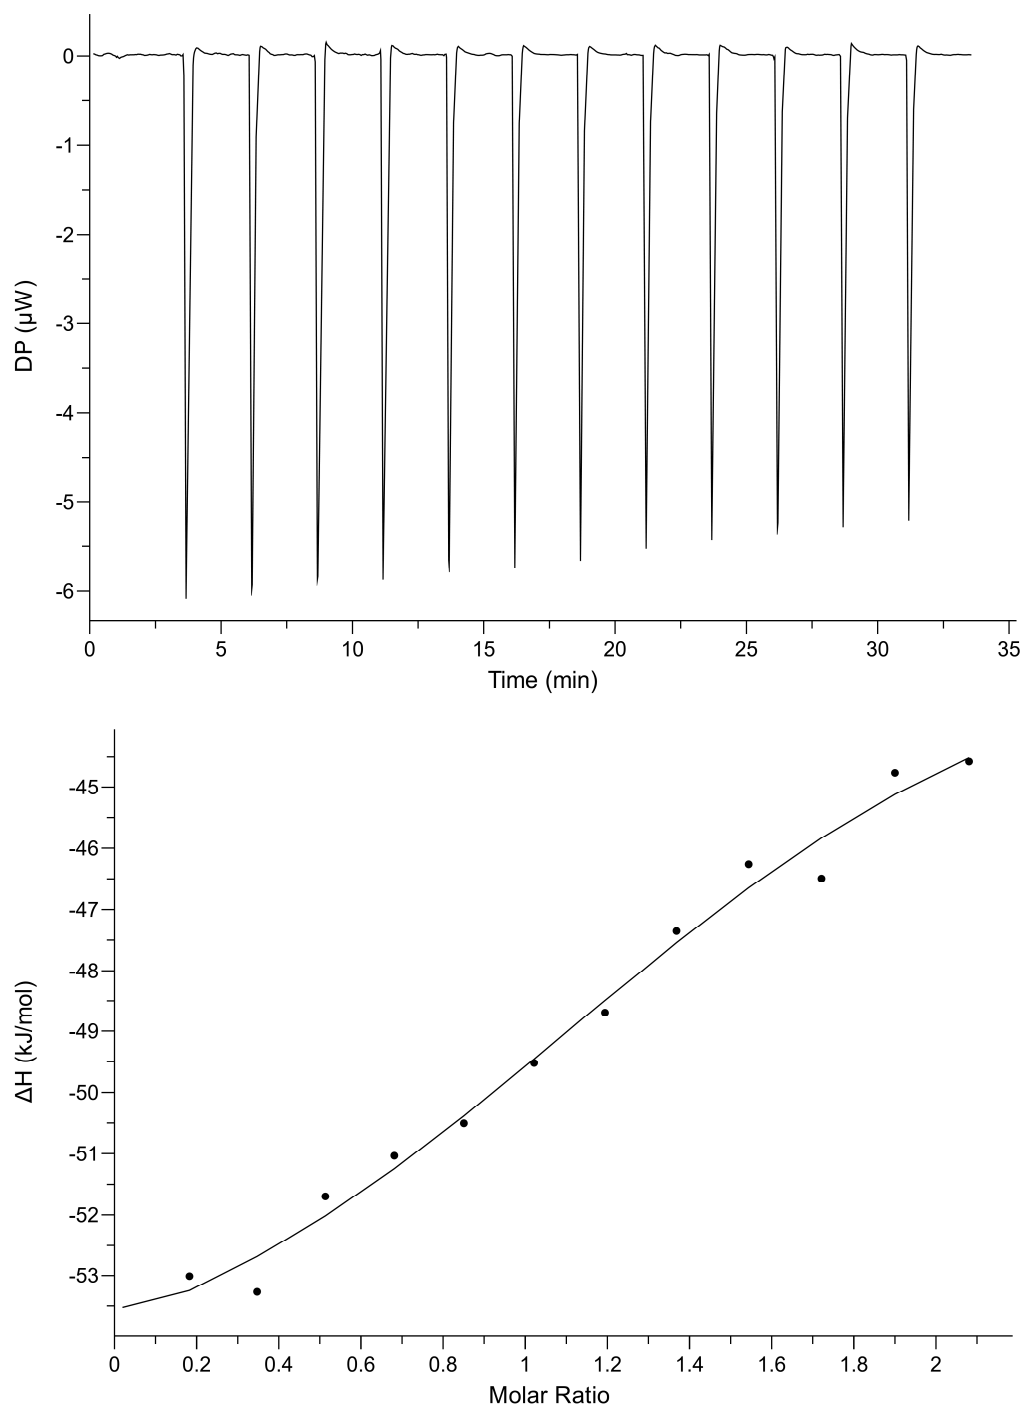

**Figure S18.** ITC thermogram and titration curve of the aptamer variant M13. Titrated with LFX. Each ITC experiment was repeated at least twice, representative thermogram and titration curve are shown.

## Supplementary Figure S19

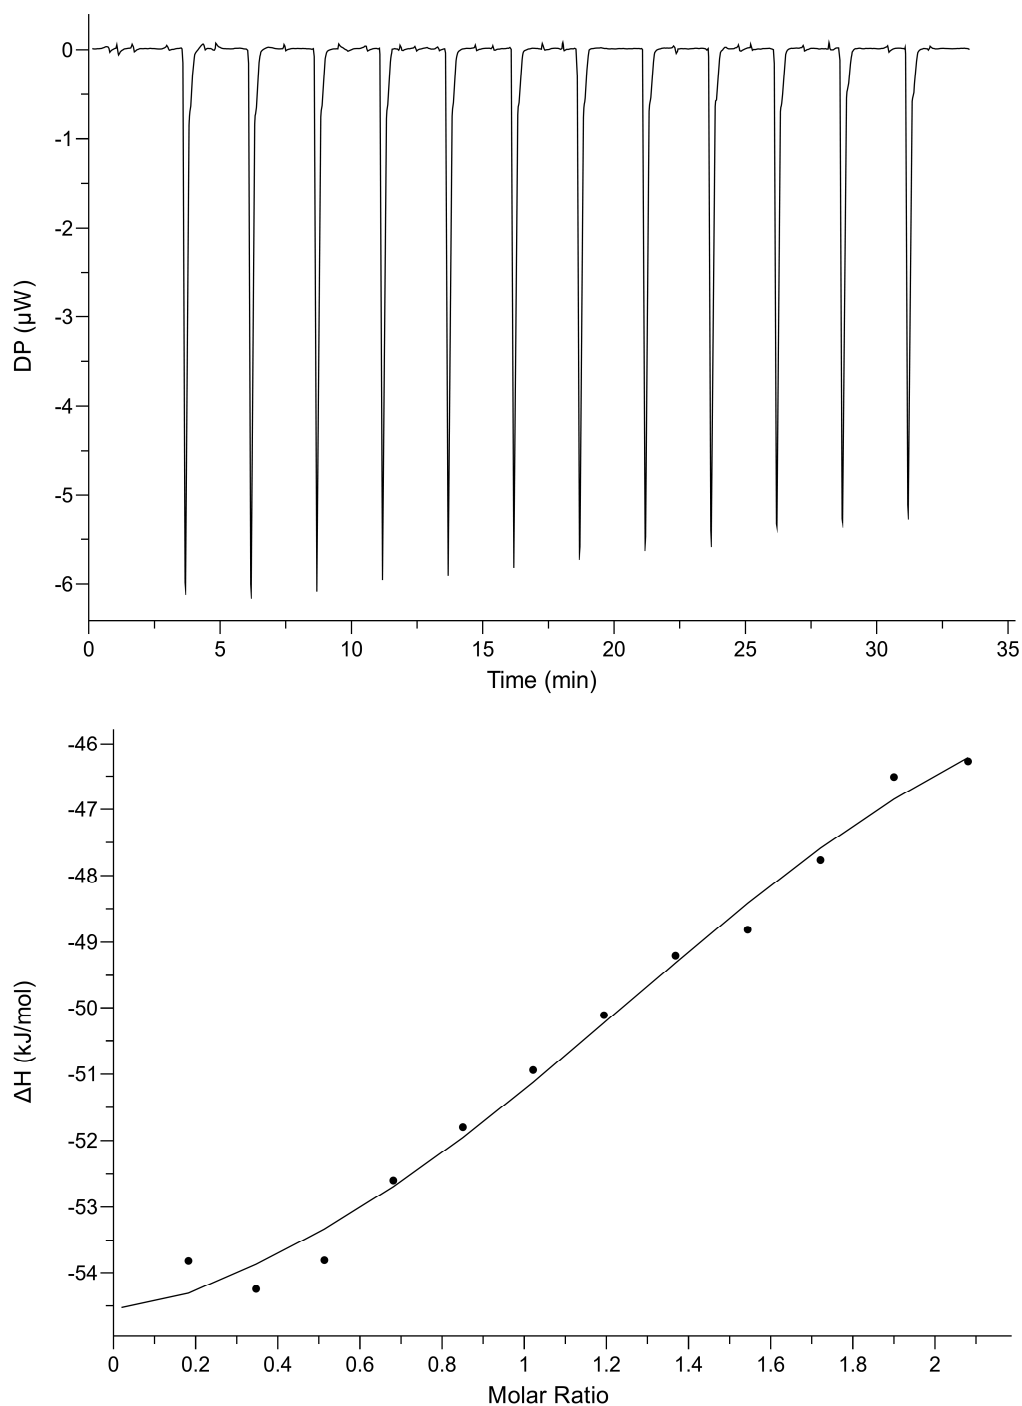

**Figure S19.** ITC thermogram and titration curve of the aptamer variant **M14**. Titrated with LFX. Each ITC experiment was repeated at least twice, representative thermogram and titration curve are shown.

## Supplementary Table S1

**Table S1.** Results of 21 rounds and naive pool of merging paired-end reads using VSEARCH's mergepairs function.

| Round | Pairs  | Merged         | Not merged    | N    | kmers | Mult.<br>align. | diffs. | over-<br>lap | Score | Exp.<br>err. | too<br>short | too<br>long |
|-------|--------|----------------|---------------|------|-------|-----------------|--------|--------------|-------|--------------|--------------|-------------|
| 0     | 130024 | 108355 (83.3%) | 21669 (16.7%) | 406  | 521   | 53              | 3      | 0            | 1676  | 467          | 3735         | 14808       |
| 1     | 153543 | 133916 (87.2%) | 19627 (12.8%) | 397  | 139   | 95              | 0      | 0            | 822   | 418          | 1957         | 15799       |
| 2     | 154376 | 136094 (88.2%) | 18282 (11.8%) | 428  | 151   | 27              | 2      | 0            | 833   | 514          | 1226         | 15101       |
| 3     | 148146 | 131259 (88.6%) | 16887 (11.4%) | 426  | 178   | 63              | 2      | 0            | 896   | 396          | 2003         | 12923       |
| 4     | 153819 | 135272 (87.9%) | 18547 (12.1%) | 425  | 152   | 21              | 2      | 0            | 999   | 701          | 1939         | 14308       |
| 5     | 159476 | 137771 (86.4%) | 21705 (13.6%) | 385  | 313   | 15              | 3      | 1            | 13903 | 525          | 2501         | 4059        |
| 6     | 129586 | 114085 (88.0%) | 15501 (12.0%) | 339  | 170   | 33              | 2      | 0            | 814   | 589          | 3950         | 9604        |
| 7     | 167780 | 146739 (87.5%) | 21041 (12.5%) | 498  | 185   | 26              | 2      | 0            | 875   | 639          | 6683         | 12133       |
| 8     | 179701 | 161985 (90.1%) | 17716 (9.9%)  | 528  | 296   | 24              | 1      | 0            | 1097  | 780          | 10064        | 4926        |
| 9     | 169506 | 145588 (85.9%) | 23918 (14.1%) | 502  | 424   | 74              | 1      | 0            | 1174  | 548          | 16716        | 4479        |
| 10    | 169293 | 154579 (91.3%) | 14714 (8.7%)  | 461  | 214   | 92              | 2      | 0            | 674   | 461          | 8358         | 4452        |
| 11    | 173891 | 164040 (94.3%) | 9851 (5.7%)   | 435  | 249   | 203             | 1      | 0            | 788   | 627          | 3348         | 4200        |
| 12    | 181026 | 172716 (95.4%) | 8310 (4.6%)   | 476  | 169   | 160             | 0      | 0            | 950   | 912          | 1941         | 3702        |
| 13    | 170565 | 162205 (95.1%) | 8360 (4.9%)   | 454  | 263   | 283             | 1      | 0            | 887   | 631          | 1463         | 4378        |
| 14    | 76012  | 71102 (93.5%)  | 4910 (6.5%)   | 189  | 134   | 98              | 0      | 2            | 489   | 365          | 596          | 3037        |
| 15    | 117767 | 110733 (94.0%) | 7034 (6.0%)   | 310  | 135   | 152             | 0      | 0            | 583   | 423          | 1157         | 4274        |
| 16    | 85773  | 71225 (83.0%)  | 14548 (17.0%) | 8991 | 115   | 99              | 0      | 0            | 353   | 326          | 1329         | 3335        |
| 17    | 93418  | 87151 (93.3%)  | 6267 (6.7%)   | 264  | 149   | 206             | 1      | 0            | 525   | 333          | 600          | 4189        |
| 18    | 104205 | 97628 (93.7%)  | 6577 (6.3%)   | 231  | 226   | 263             | 2      | 0            | 533   | 285          | 756          | 4281        |
| 19    | 95134  | 89620 (94.2%)  | 5514 (5.8%)   | 241  | 139   | 282             | 0      | 0            | 471   | 340          | 668          | 3373        |
| 20    | 98617  | 92443 (93.7%)  | 6174 (6.3%)   | 275  | 215   | 245             | 0      | 2            | 610   | 491          | 954          | 3382        |
| 21    | 92650  | 86713 (93.6%)  | 5937 (6.4%)   | 218  | 162   | 335             | 1      | 0            | 571   | 332          | 639          | 3679        |

This table details the number of processed pairs (Pairs), merging efficiency (Merged, Not merged), and reasons for unsuccessful merges. Columns represent: 'N' for too many ambiguous nucleotides, 'kmers' for insufficient k-mer alignment, 'Mult. align.' for multiple alignment possibilities, 'diffs.' for high mismatches, 'overlap' for short overlap regions, 'Score' for low alignment scores or high score drops, 'Exp. err.' for high expected errors, 'too short' and 'too long' for merged fragments outside length thresholds.

## Supplementary Table S2

**Table S2.** Post-Merging Sequence Filtering Results Over 21 Rounds and naive pool.

| Round | Kept   | Percentage |
|-------|--------|------------|
| 0     | 102223 | 0.94       |
| 1     | 129586 | 0.97       |
| 2     | 131965 | 0.97       |
| 3     | 122378 | 0.93       |
| 4     | 130598 | 0.97       |
| 5     | 132554 | 0.96       |
| 6     | 108446 | 0.95       |
| 7     | 140978 | 0.96       |
| 8     | 156546 | 0.97       |
| 9     | 137164 | 0.94       |
| 10    | 147984 | 0.96       |
| 11    | 158534 | 0.97       |
| 12    | 167994 | 0.97       |
| 13    | 155923 | 0.96       |
| 14    | 68925  | 0.97       |
| 15    | 107468 | 0.97       |
| 16    | 67918  | 0.95       |
| 17    | 83981  | 0.96       |
| 18    | 93685  | 0.96       |
| 19    | 87222  | 0.97       |
| 20    | 87184  | 0.94       |
| 21    | 84002  | 0.97       |

This table presents the count and percentage of sequences retained after filtering based on Levenshtein distance from a template, following VSEARCH post-merging and orientation processes.

## Supplementary Table S3

**Table S3.** Number of Unique Sequence Counts Through Preprocessing Stages Over 21 Rounds Plus Naive Pool.

| Round | Post-Merging | Post-Orientation | Post-Template Filtering |
|-------|--------------|------------------|-------------------------|
| 0     | 85615        | 85612            | 80783                   |
| 1     | 105487       | 105480           | 102110                  |
| 2     | 107338       | 107332           | 104067                  |
| 3     | 103126       | 103120           | 96145                   |
| 4     | 106086       | 106079           | 102399                  |
| 5     | 108004       | 107963           | 103843                  |
| 6     | 90176        | 89901            | 85443                   |
| 7     | 110678       | 109565           | 105170                  |
| 8     | 115568       | 113358           | 109112                  |
| 9     | 81176        | 78414            | 72950                   |
| 10    | 46403        | 43650            | 40708                   |
| 11    | 23935        | 21620            | 19872                   |
| 12    | 18328        | 16128            | 14721                   |
| 13    | 17229        | 15213            | 13612                   |
| 14    | 6801         | 5653             | 4906                    |
| 15    | 9243         | 7674             | 6644                    |
| 16    | 7588         | 6347             | 5254                    |
| 17    | 8035         | 6658             | 5690                    |
| 18    | 8324         | 6877             | 5789                    |
| 19    | 7243         | 5954             | 5221                    |
| 20    | 8351         | 6952             | 5643                    |
| 21    | 7733         | 6387             | 5494                    |

The number of unique sequences remaining after post-merging, post-orientation, and post-template filtering stages are shown.
